# Supplementary material
Source: PubMed Central journal article supplement (PMC5005437)
Supplement: mmc1.pdf [file mmc1.pdf]

**The American Journal of Human Genetics, Volume 99**

**Supplemental Data**

**Mutations in *WNT10B* Are Identified**

**in Individuals with Oligodontia**

**Ping Yu, Wenli Yang, Dong Han, Xi Wang, Sen Guo, Jinchun Li, Fang Li, Xiaoxia Zhang, Sing-Wai Wong, Baojing Bai, Yao Liu, Jie Du, Zhong Sheng Sun, Songtao Shi, Hailan Feng, and Tao Cai**

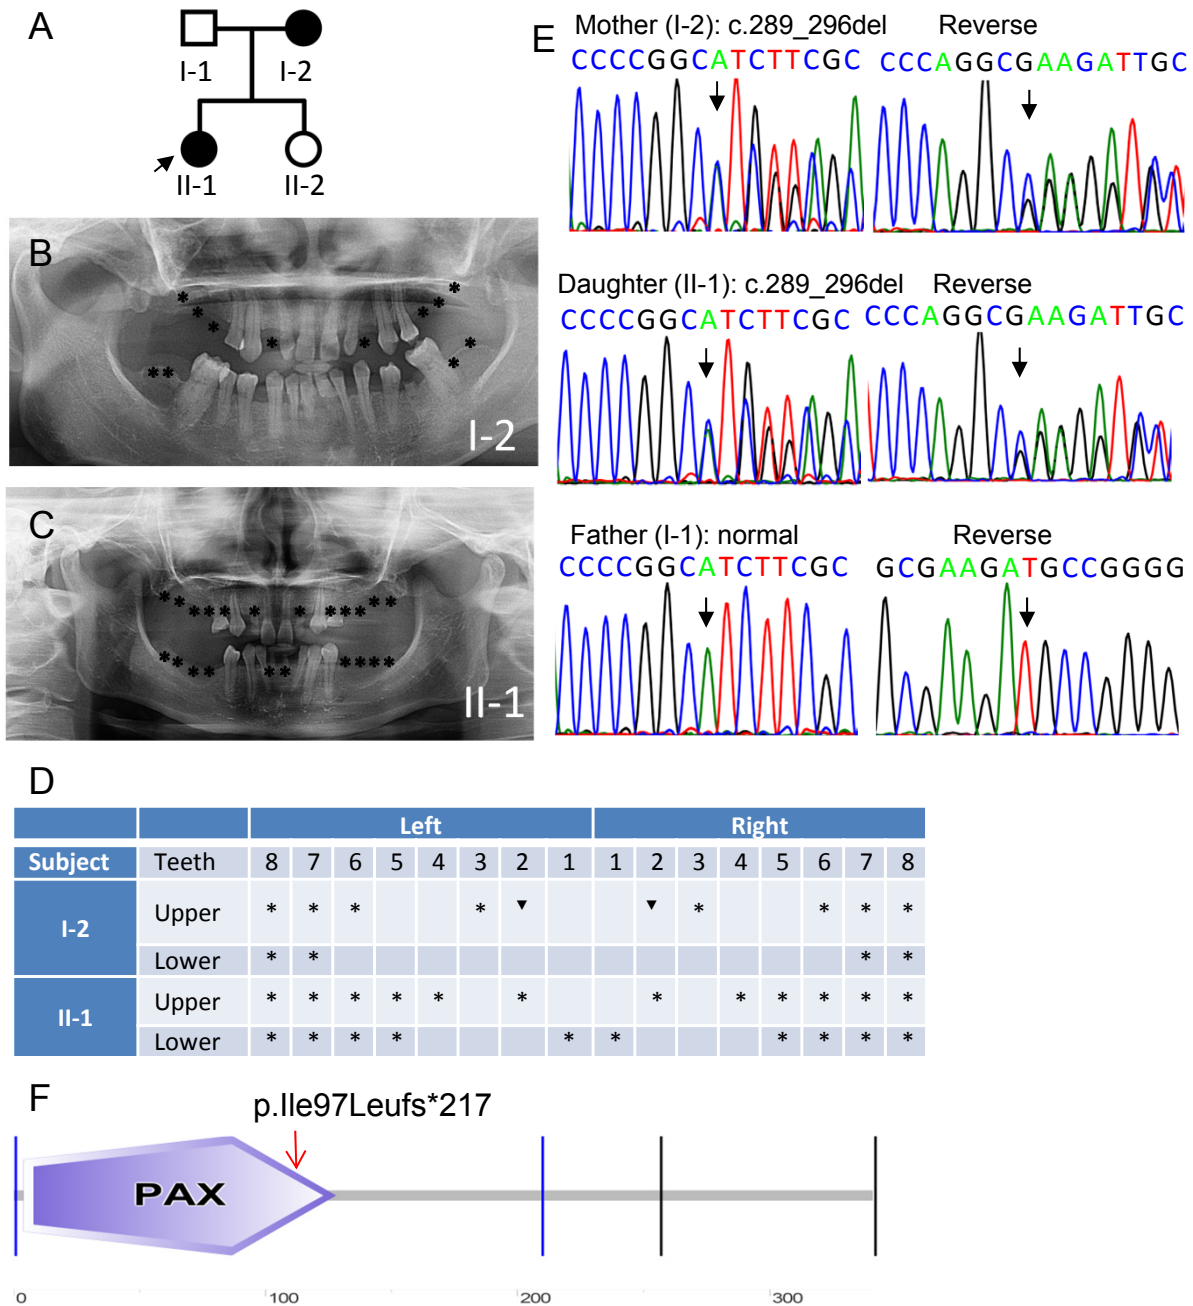

**Figure S1. A frameshift mutation of *PAX9* identified in the individuals with inherited oligodontia (*STHAG3*).**

(A) The ZZWX-1 pedigree; (B-C) Panoramic radiographs of dentitions with tooth agenesis of two individuals. Missing teeth (23/32 molars and 6/24 incisors) are denoted with asterisks (\*). (D) Schematic presentation of congenitally missing teeth of two individuals, which are filled by (\*); cone-shaped tooth is represented by (▼); (E) Sanger sequencing shows the mutation c.289\_296del. (F) The p.Ile97Leufs\*217 mutation is indicated on the schematic representation of the *PAX9* protein.

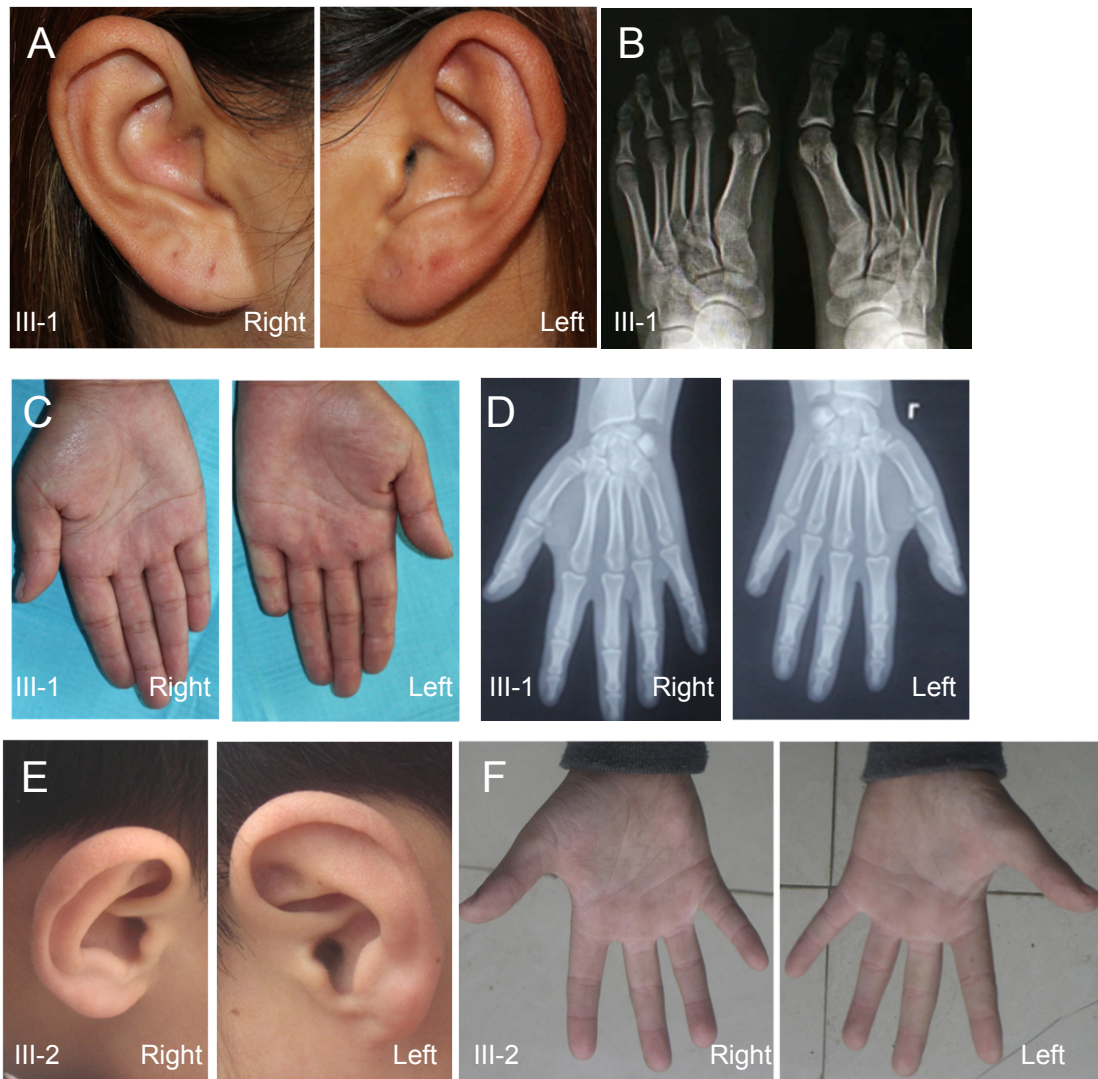

**Figure S2. Additional clinical information of the affected individual III-1 and III-2.** No obvious developmental abnormalities are seen in ear, hand, and foot. The 5<sup>th</sup> finger of left hand in individual III-1 (panel C and D) is shorter than normal due to an accident injury.

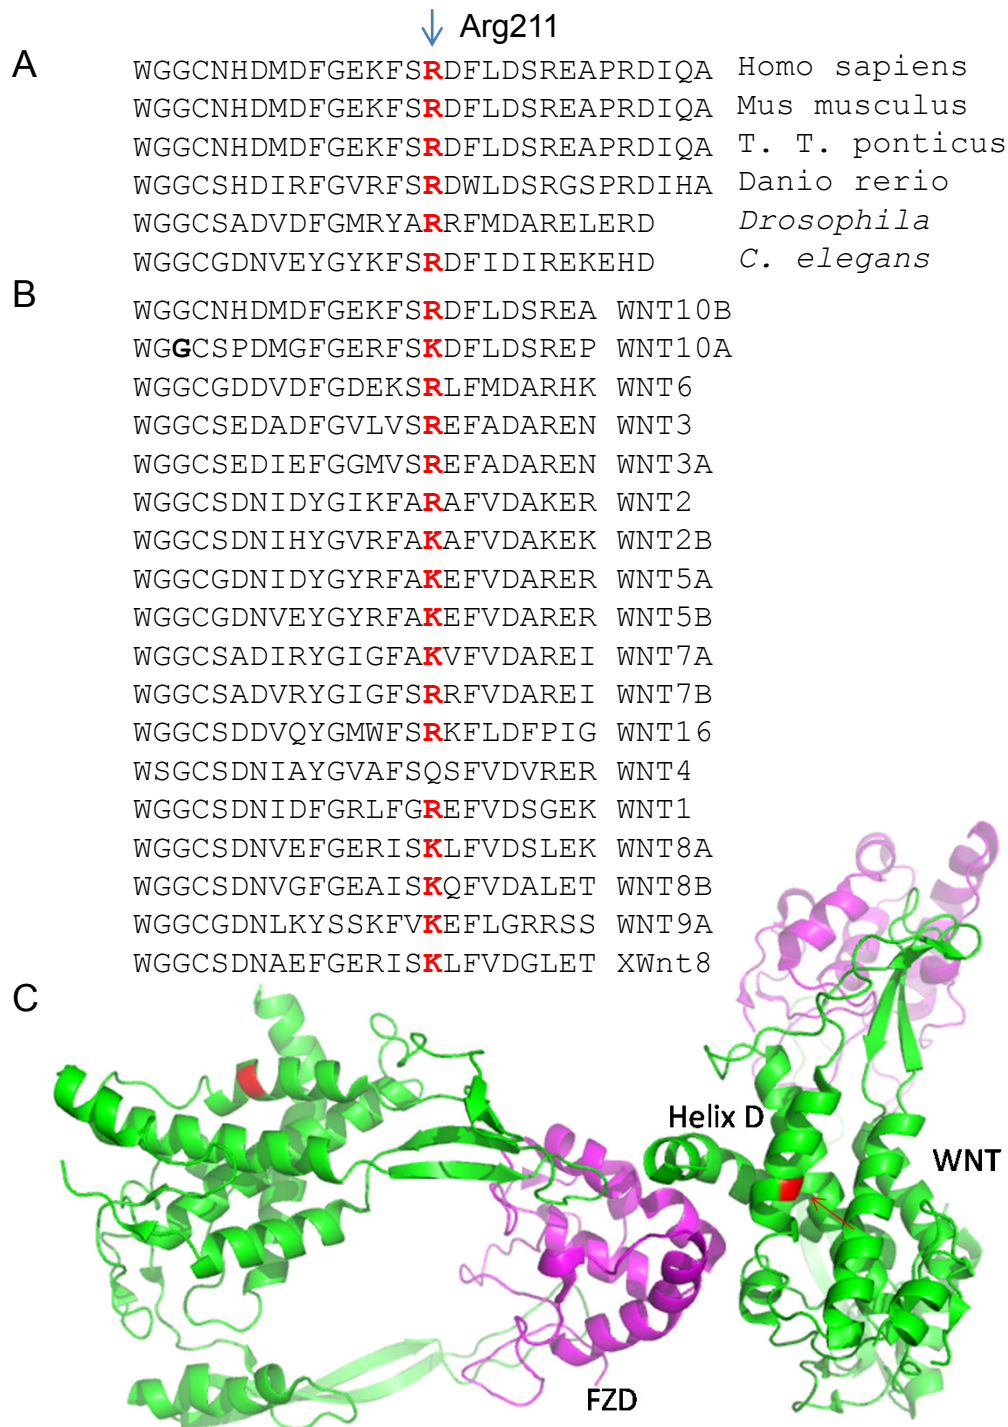

**Figure S3. Multiple sequence alignment and 3D structural analysis.**

(A) Sequence alignment of Arg211-containing region of WNT10B in different species.  
 (B) The Arg211-containing region in 18 different Wnt family members.  
 (C) 3D structural analysis of WNT10B paralog in *Xenopus*. The residue Arg211 (in red) is positioned in the helix D, interacting with cysteine-rich domain of Frizzled-8 (FZD). The model is established using PyMOL. PDB ID code, 4F0A (<http://www.pdb.org>).

|                                |                                |                |  |
|--------------------------------|--------------------------------|----------------|--|
| A                              | ↓ Pro190                       |                |  |
|                                | GPGSSPSPG <b>P</b> QDTWEWGGCNH | H. Sapiens     |  |
|                                | GPGSSPSPG <b>P</b> QDTWEWGGCNH | P. Troglodytes |  |
|                                | GPGSSPSPG <b>P</b> QDTWEWGGCNH | S. Scrofa      |  |
|                                | GPGSGSSPG <b>P</b> QDTWEWGGCNH | O. Cuniculus   |  |
|                                | GPGSGSSPG <b>P</b> QDTWEWGGCNH | M. Mulatta     |  |
|                                | IPGSVPGPG <b>P</b> QDTWEWGGCNH | R. Norvegicus  |  |
|                                | VPGSVPSPG <b>P</b> QDTWEWGGCNH | M. Musculus    |  |
|                                | PGSSPPGPG <b>P</b> QDTWEWGGCNH | C. Porcellus   |  |
|                                | HPMSLLKPL <b>P</b> DEVTMLQDTWE | D. Rerio       |  |
| TPLLRETPE <b>P</b> SPQDTWEWGGC | X. Tropicalis                  |                |  |
| B                              | ↓ Phe284                       |                |  |
|                                | AALRERLGRAI <b>F</b> IDTHNRNSG | H. Sapiens     |  |
|                                | AALRERLGRAI <b>F</b> IDTHNRNSG | P. Troglodytes |  |
|                                | AALRERLGRAI <b>F</b> IDTHNRNSG | S. Scrofa      |  |
|                                | AALRERLGRAI <b>F</b> IDTHNRNSG | O. Cuniculus   |  |
|                                | AALRERLGRAI <b>F</b> IDTHNRNSG | M. Mulatta     |  |
|                                | AALRERLGRAI <b>F</b> IDTHNRNSG | R. Norvegicus  |  |
|                                | AALRERLSRAI <b>F</b> IDTHNRNSG | M. Musculus    |  |
|                                | AALKERLGRAV <b>F</b> IDTHNRNSG | C. Porcellus   |  |
|                                | SLLREKFLTAI <b>F</b> INSQNKNG  | D. Rerio       |  |
| TLMRDKLQRAV <b>F</b> VNSRNKNSG | X. Tropicalis                  |                |  |
| C                              | ↓ Trp262                       |                |  |
|                                | GTSGSCQFKT <b>CW</b> RAAPEFRAV | H. Sapiens     |  |
|                                | GTSGSCQFKT <b>CW</b> RAAPEFRAV | P. Troglodytes |  |
|                                | GTSGSCQFKT <b>CW</b> RAAPEFRAV | S. Scrofa      |  |
|                                | GTSGSCQFKT <b>CW</b> RAAPEFRAV | O. Cuniculus   |  |
|                                | GTSGSCQFKT <b>CW</b> RAAPEFRAV | M. Mulatta     |  |
|                                | GTSGSCQFKT <b>CW</b> RAAPEFRAI | R. Norvegicus  |  |
|                                | GTSGSCQFKT <b>CW</b> RAAPEFRAI | M. Musculus    |  |
|                                | GTSGSCQFKT <b>CW</b> RAAPEFRAV | C. Porcellus   |  |
|                                | GTSGSCQFQT <b>CW</b> HVSPEFRLV | T. Rubripes    |  |
| GTSGSCQFKT <b>CW</b> YVSPEFRLV | D. Rerio                       |                |  |
| GMSGSQLKT <b>CW</b> KSAPDFHIV  | D. Melanogaster                |                |  |

**Figure S4. Multiple sequence alignment.** The residue Pro190-, Phe284-, and Trp262-containing regions of WNT10B are compared in 10 different species as indicated.

A Subject E3-2:

|      | Right quadrants |   |   |   |   |   |   |   | Left quadrants |   |   |   |   |   |   |   |
|------|-----------------|---|---|---|---|---|---|---|----------------|---|---|---|---|---|---|---|
| MAX  | 8               | 7 | 6 | 5 | 4 | 3 | 2 | 1 | 1              | 2 | 3 | 4 | 5 | 6 | 7 | 8 |
| MAND | 8               | 7 | 6 | 5 | 4 | 3 | 2 | 1 | 1              | 2 | 3 | 4 | 5 | 6 | 7 | 8 |
|      | ■               | □ | □ | ■ | ■ | □ | ■ | ■ | ■              | ■ | □ | ■ | ■ | □ | □ | ■ |
|      | □               | □ | ■ | ■ | □ | ■ | ■ | ■ | ■              | ■ | □ | ■ | ■ | □ | □ | ■ |

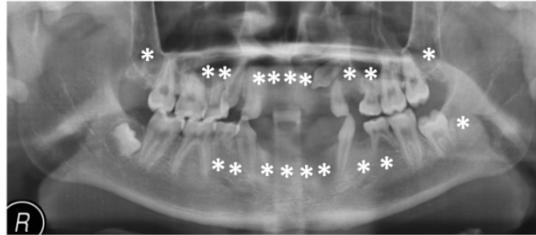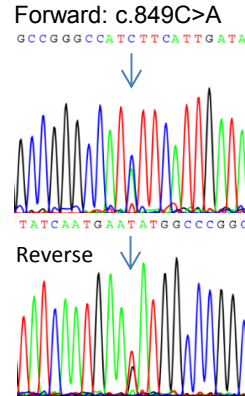

B Subject F3-46:

|      | Right quadrants |   |   |   |   |   |   |   | Left quadrants |   |   |   |   |   |   |   |
|------|-----------------|---|---|---|---|---|---|---|----------------|---|---|---|---|---|---|---|
| MAX  | 8               | 7 | 6 | 5 | 4 | 3 | 2 | 1 | 1              | 2 | 3 | 4 | 5 | 6 | 7 | 8 |
| MAND | 8               | 7 | 6 | 5 | 4 | 3 | 2 | 1 | 1              | 2 | 3 | 4 | 5 | 6 | 7 | 8 |
|      | ■               | □ | □ | ■ | ■ | □ | ■ | ■ | □              | ■ | □ | ■ | ■ | □ | □ | ■ |
|      | ■               | □ | ■ | ■ | □ | ■ | ■ | ■ | □              | □ | □ | ■ | ■ | □ | □ | ■ |

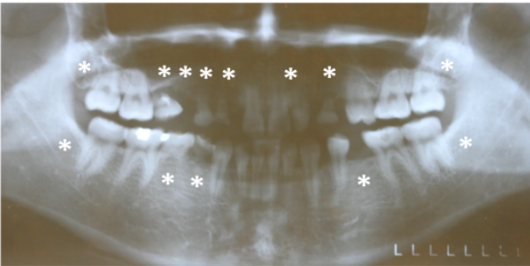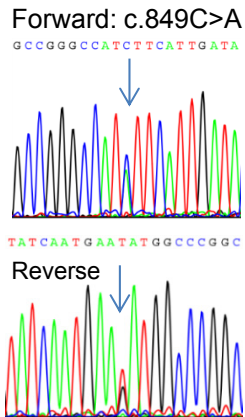

C Subject O3-120:

|      | Right quadrants |   |   |   |   |   |   |   | Left quadrants |   |   |   |   |   |   |   |
|------|-----------------|---|---|---|---|---|---|---|----------------|---|---|---|---|---|---|---|
| MAX  | 8               | 7 | 6 | 5 | 4 | 3 | 2 | 1 | 1              | 2 | 3 | 4 | 5 | 6 | 7 | 8 |
| MAND | 8               | 7 | 6 | 5 | 4 | 3 | 2 | 1 | 1              | 2 | 3 | 4 | 5 | 6 | 7 | 8 |
|      | ?               | ■ | □ | ■ | ■ | □ | ■ | ■ | □              | ■ | ■ | □ | ■ | ■ | □ | ? |
|      | ?               | ■ | □ | ■ | ■ | □ | ■ | ■ | ■              | ■ | □ | ■ | ■ | □ | □ | ? |

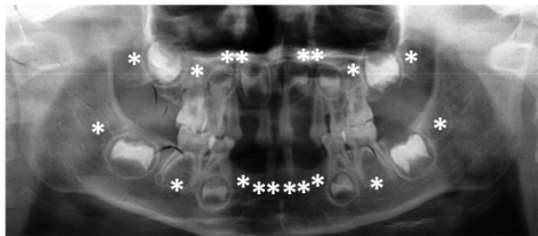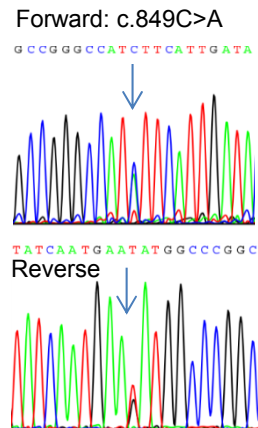

**Figure S5. The c.849C>A variant of *WNT10B* is associated with oligodontia.**

Panoramic radiographs (left panels) and the variants in Sanger chromatograms (right panels) are shown for subject E3-2 (A), F3-46 (B), and O3-120 (C) respectively. Data of the deceased subject X0-401 with the same variant is not shown. Also, MAF of this variant in ExAc ( $49/119396 = 0.0004104$ ) is markedly lower than the MAF ( $4/145 = 0.0275$ ) in the cohort of affected individuals ( $P = 1.39569E-27$ ). Positions of each of missing teeth are indicated by filled box in schematic maxillary (MAX) and lower mandible (MAND) locations.

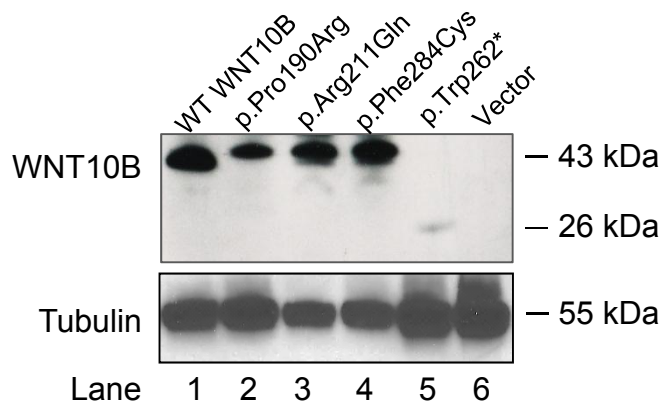

**Figure S6. Expression of WT and mutant WNT10B in COS-7 cells.**

COS-7 cells were transfected with each of the plasmids as indicated in the figure by Lipofectamine 2000 (Invitrogen). Stable transfectants were selected in medium containing G418 (500  $\mu\text{g}/\text{ml}$ ) for four weeks. Drug resistant cells were lysed with M-PER Mammalian Protein Extraction Reagent (Pierce Biotechnology) and then prepared (30  $\mu\text{g}$  per lane) for Western blotting (ECL system, GE Healthcare Life Sciences) using anti-WNT10B antibody (H-70) (Santa Cruz Biotechnology) at 1:500 dilution. Tubulin level is also shown as a loading control. A 43-kDa of main band is detected as predicted in the WT and each of the three missense mutation constructs transfected cells. In contrast, the cells transfected with p.Trp262\*-containing plasmid only produced a small amount of protein with lower molecular weight, suggesting that the expression of the nonsense mutant is unstable.

| Subject                                             | II-1              | III-1                      | III-2                  | N2-107           | H3-63                                    | O3-113                                                |
|-----------------------------------------------------|-------------------|----------------------------|------------------------|------------------|------------------------------------------|-------------------------------------------------------|
| <b>Family history</b>                               | Yes               | Yes                        | Yes                    | No               | No                                       | No                                                    |
| <b>Gender</b>                                       | Female            | Female                     | Male                   | Female           | Female                                   | Male                                                  |
| <b>Age at first visit</b>                           | ~40               | 21                         | 11                     | 21               | 20                                       | 25                                                    |
| <b>Sparse hair</b>                                  | No                | Yes                        | Yes                    | No               | No                                       | No                                                    |
| <b>Hair pigment</b>                                 | Black             | Light brown                | Light brown            | Black            | Brown                                    | Black                                                 |
| <b>Eyebrows</b>                                     | Sparse            | Sparse                     | Sparse                 | Normal           | Normal                                   | Normal                                                |
| <b>Eyelid cysts</b>                                 | No                | No                         | No                     | No               | No                                       | No                                                    |
| <b>Vision</b>                                       | N.E.              | Astigmatism<br>(right eye) | Myopia<br>(right eye)  | Myopia<br>(both) | Myopia and<br>astigmatism<br>(both eyes) | Normal                                                |
| <b>Lacrimal duct defect</b>                         | No                | No                         | No                     | No               | No                                       | No                                                    |
| <b>Hearing ability</b>                              | No                | No                         | Right ear<br>reduced   | No               | No                                       | No                                                    |
| <b>Shape of tooth</b>                               | 4 cone-<br>shaped | Small                      | Small, cone-<br>shaped |                  | 11, 21<br>shovel-<br>shaped              | 11, 21<br>shovel-<br>shaped; 12<br>22 cone-<br>shaped |
| <b>Missing teeth</b>                                | 24                | 12                         | 15                     | 16               | 9                                        | 10                                                    |
| <b>Dry skin</b>                                     | No                | Yes                        | Yes                    | No               | No                                       | No                                                    |
| <b>Hyperhidrosis of<br/>plantar<br/>hands/feet</b>  | No                | No                         | No                     | No               | No                                       | No                                                    |
| <b>Dystrophic<br/>fingernails</b>                   | No                | No                         | No                     | No               | No                                       | Yes                                                   |
| <b>Hyperkeratosis<br/>of plantar<br/>hands/feet</b> | No                | No                         | No                     | No               | No                                       | No                                                    |
| <b>Mutation</b>                                     | p.Arg211Gln       | p.Arg211Gln                | p.Arg211Gln            | p.Pro190Arg      | p.Trp262*                                | p.Phe284Cys                                           |

**Table S1. Clinical Manifestations in Individuals with Oligodontia.**

Number of missing teeth (the third molar tooth is not included); N.E., not examined;



| <b>WNT10B</b>                      | <b>Forward primer (5'→3')</b>                     | <b>Reverse primer (5'→3')</b>                      | <b>Product (bp)</b> |
|------------------------------------|---------------------------------------------------|----------------------------------------------------|---------------------|
| <b>Mutation screening primers:</b> |                                                   |                                                    |                     |
| <b>Exon 2 &amp; 3</b>              | CCTGAACCCGCATCAAGTCT                              | GCCGCGAAACCATCCCTT                                 | 607                 |
| <b>Exon 4</b>                      | CTCAGCTGCCTGTCAACCTTA                             | TGACTTGCTGATGGTGAGTGT                              | 547                 |
| <b>Exon 5</b>                      | ACTGCAATGTCCTTTCTGTTCTG                           | GCTTCCAGGGACCAAGAGTG                               | 714                 |
| <b>Primers for mutagenesis:</b>    |                                                   |                                                    |                     |
| <b>c.569C&gt;A</b>                 | GGCTCAAGCCCCAGCCCTGGCCGCC<br>AGGACACATGGGAATGGGG  | CCCATTCCCATGTGTCCTGGCGG<br>CCAGGGCTGGGGCTTGAGCC    | Mutated             |
| <b>c.632G&gt;A</b>                 | GACTTTGGAGAGAAGTTCTCTCAGG<br>ATTCTTGGATTCCAGGGAA  | TTCCCTGGAATCCAAGAAATCCTG<br>AGAGAACTTCTCTCAAAGTC   | Mutated             |
| <b>c.786G&gt;A</b>                 | CAGCTGCCAGTTCAAGACATGCTGA<br>AGGGCGGCCCCAGAGTTCCG | CGGAACTCTGGGGCCGCCCTTCCAG<br>CATGTCTTGAAGTGGCAGCTG | Mutated             |
| <b>c.851T&gt;G</b>                 | GAGCGGCTGGGCCGGGCCATCTGCA<br>TTGATACCCACAACCGCAAT | ATTGCGGTTGTGGGTATCAATGCA<br>GATGGCCCCGCCAGCCGCTC   | Mutated             |

**Table S2. Primers used for PCR amplification of human *WNT10B* and mutagenesis.**

Note: The exon 1 of *WNT10B* is a non-coding exon, which was not included in the screening.

| Subject | Genetic form         | Mutation coding seq  | Mutation in protein | Protein domain                | Phenotypes                                           | Ref.         |
|---------|----------------------|----------------------|---------------------|-------------------------------|------------------------------------------------------|--------------|
|         | Heterozygous         | -607G>C              | No                  | Promoter                      | Obesity                                              | <sup>1</sup> |
|         | Heterozygous         | c.767G>A             | p.Cys256Tyr         | WNT domain                    | Obesity                                              | <sup>2</sup> |
| 1985223 | Heterozygous         | c.868C>T             | p.Arg290Cys         | WNT domain                    | No split-hand/foot;<br>No teeth agenesis             | This study   |
| HCM914  | Heterozygous         | c.901C>T             | p.Pro301Ser         | WNT domain                    | No split-hand/foot;<br>No teeth agenesis             | This study   |
|         | Homozygous recessive | c.986C>G             | p.Thr329Arg         | WNT domain                    | Split-hand/foot;<br>teeth abnormalities not observed | <sup>3</sup> |
| 1872988 | Heterozygous         | c.995G>A             | p.Arg332Gln         | WNT domain                    | No split-hand/foot;<br>No teeth agenesis             | This study   |
|         | Homozygous recessive | c.994C>T             | p.Arg332Trp         | WNT domain                    | Split-hand/foot;<br>Teeth not mentioned              | <sup>4</sup> |
|         | Homozygous recessive | c.1165_1168 delAAGT  | p.Lys388Glufs *36   | Influencing binding with Fzd8 | Split-hand/foot;<br>teeth abnormalities not observed | <sup>5</sup> |
|         | Homozygous recessive | c.300_306 dupAGGGCGG | ND                  | Predicted to be LoF           | Split-hand/foot;<br>teeth abnormalities not observed | <sup>5</sup> |
|         | Homozygous recessive | c.458_461 dupAGCA    | ND                  | Predicted to be LoF           | Split-hand/foot;<br>teeth abnormalities not observed | <sup>6</sup> |

**Table S3. Summary of reported variants in *WNT10B* related to individuals with disorders.**

Note: Mutations of *WNT10B* in individuals with split-hand/foot (SHFM6, OMIM 225300). LoF, loss-of-function; ND, not determined. Also, heterozygous missense mutations or polymorphic variants in *WNT10B* were linked to obesity. However, this phenotype was not observed in the present study. Furthermore, three individuals in our inhouse database, who did not show teeth agenesis (ID #1985223, HCM914, and 1872988), were found to carry heterozygous rare missense variants in *WNT10B*, suggesting the C-terminal variants of the gene are not associated with teeth agenesis.

#### References

- Kim, I.C., Cha, M.H., Kim, D.M., Lee, H., Moon, J.S., Choi, S.M., Kim, K.S., and Yoon, Y. (2011). A functional promoter polymorphism -607G>C of *WNT10B* is associated with abdominal fat in Korean female subjects. *J Nutr Biochem* 22, 252-258.
- Christodoulides, C., Scarda, A., Granzotto, M., Milan, G., Dalla Nora, E., Keogh, J., De Pergola, G., Stirling, H., Pannacciulli, N., Sethi, J.K., et al. (2006). *WNT10B* mutations in human obesity. *Diabetologia* 49, 678-684.
- Khan, S., Basit, S., Zimri, F.K., Ali, N., Ali, G., Ansar, M., and Ahmad, W. (2012). A novel homozygous missense mutation in *WNT10B* in familial split-hand/foot malformation. *Clin Genet* 82, 48-55.
- Ugur, S.A., and Tolun, A. (2008). Homozygous *WNT10b* mutation and complex inheritance in Split-Hand/Foot Malformation. *Hum Mol Genet* 17, 2644-2653.
- Aziz, A., Irfanullah, Khan, S., Zimri, F.K., Muhammad, N., Rashid, S., and Ahmad, W. (2014). Novel homozygous mutations in the *WNT10B* gene underlying autosomal recessive split hand/foot malformation in three consanguineous families. *Gene* 534, 265-271.
- Blattner, A., Huber, A.R., and Rothlisberger, B. (2010). Homozygous nonsense mutation in *WNT10B* and sporadic split-hand/foot malformation (SHFM) with autosomal recessive inheritance. *Am J Med Genet A* 152A, 2053-2056.
